# Supplementary material for: 12-Oxophytodienoate Reductase Overexpression Compromises Tolerance to Botrytis cinerea in Hexaploid and Tetraploid Wheat
Source: MDPI journal article supplement (doi:10.3390/plants12102050), 2023-05-22
Supplement: s1 [file s1]

**Supplementary Table S1.** Segregation analysis of *GFP* expression in T1 progeny of T0 transgenic plants of tetraploid emmer wheat 'Runo'

| T0 plant | Number of T1 seeds tested | Seedlings T1                                              |        |                                                                       |        |
|----------|---------------------------|-----------------------------------------------------------|--------|-----------------------------------------------------------------------|--------|
|          |                           | Observed <i>GFP</i> segregation ratio (positive:negative) | Ratio  | $\chi^2$ value for the expected segregation ratio (positive:negative) |        |
|          |                           |                                                           |        | 3:1                                                                   | 15:1   |
| RC-1     | 150                       | 147:3                                                     | 49.0:1 | 42.32                                                                 | 4.62   |
| RC-2b    | 99                        | 79:20                                                     | 4.0:1  | 1.22                                                                  | 32.89  |
| RC-3     | 89                        | 56:33                                                     | 1.7:1  | 6.93                                                                  | 144.36 |
| RC-7     | 104                       | 65:39                                                     | 1.7:1  | 8.67                                                                  | 173.33 |
| RC-10    | 74                        | 46:28                                                     | 1.6:1  | 6.50                                                                  | 126.01 |
| RC-12    | 87                        | 64:23                                                     | 2.8:1  | 0.10                                                                  | 60.51  |
| RC-13    | 99                        | 49:50                                                     | 1.0:1  | 34.35                                                                 | 330.91 |
| RC-16    | 112                       | 98:14                                                     | 7.0:1  | 9.33                                                                  | 7.47   |
| RC-17    | 111                       | 73:38                                                     | 1.9:1  | 5.05                                                                  | 148.35 |
| RC-23a   | 76                        | 53:23                                                     | 2.3:1  | 1.12                                                                  | 74.79  |
| RC-26    | 48                        | 31:11                                                     | 3.4:1  | 0.11                                                                  | 22.76  |
| RC-28    | 133                       | 42:91                                                     | 0.5:1  | 133.74                                                                | 877.36 |
| RC-29    | 54                        | 37:17                                                     | 2.2:1  | 1.21                                                                  | 58.67  |
| RC-30    | 128                       | 87:41                                                     | 2.1:1  | 3.38                                                                  | 145.20 |
| RC-33    | 109                       | 81:28                                                     | 2.9:1  | 0.03                                                                  | 70.29  |

if  $\chi^2$  value is below 3.84 ( $P > 0.05$ ) the observed segregation ratio is not significantly different from the expected ratio

**Supplementary Table S2.** List of primers used in this study

| Primer name | Sequence (5' – 3')                                             | Product length, bp | Purpose        |
|-------------|----------------------------------------------------------------|--------------------|----------------|
| AtOPR3mid   | CCGAAGGCACCATGGTCTCTCCC<br>TCGGAAGCTTCTAAAGCCCGAGG             | 295                | RT-PCR         |
| AtOPR3a     | ACGTGCTTCTCATGCAGTGT<br>ACTTCACGTGGGAACCATCG                   | 116                | qPCR           |
| GFP         | GCGACGTAAACGGCCACAAG<br>CCAGCAGGACCATGTGTGATCG                 | 606                | RT-PCR         |
| TaWIN       | TTTTCTGTGTTCTACTATGAGATCTTGAA<br>AAGTGCATAATTAAACAGAGGTAGTGATG | 348                | RT-PCR<br>qPCR |

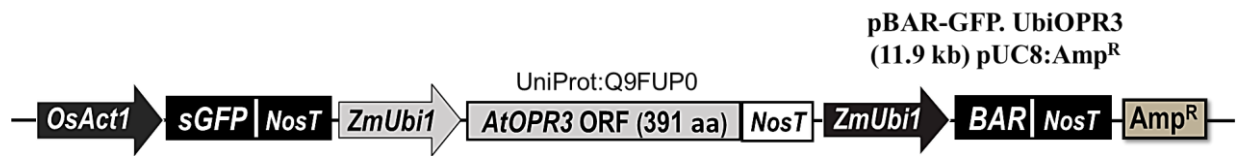

Figure S1: Schematic representation of the pBAR-GFP.UbiOPR3 expression cassette used for emmer wheat transformation. *OsAct1*, rice *Actin 1* promoter; *ZmUbi1*, maize *Ubiquitin 1* promoter; *NosT*, *Nopaline Synthase* terminator; *sGFP*, modified (S65T) *Green Fluorescent Protein* gene; *BAR*, BASTA resistance gene (phosphinothricin acetyl transferase); *AmpR*, ampicillin resistance gene.

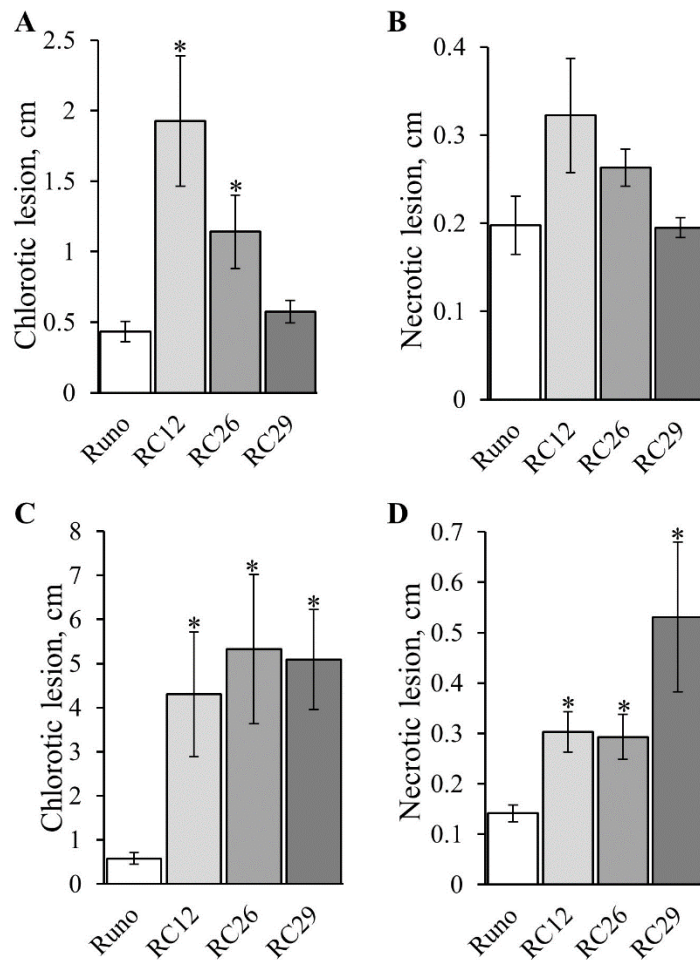

Figure S2. The tolerance of transgenic tetraploid wheat plants to *B. cinerea*. The size of the chlorotic lesions (a and c) and necrotic lesions (b and d) formed on the second (a and b) and third (c and d) leaves infected with *B. cinerea* on the fifth day after infection. Data are averages of at least three biological replicas consisting of 4-5 plants  $\pm$  SE. Stars indicate a statistically significant difference between transgenic lines and non-transgenic control at  $p \leq 0.05$  assessed by the Student's t test.

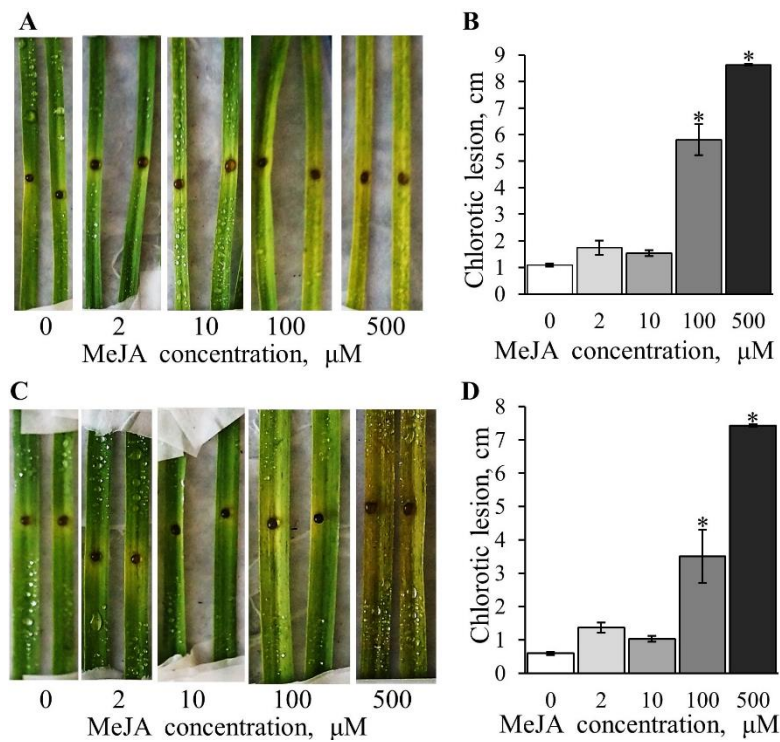

Figure S3. Effect of MeJA on *B. cinerea* infection development on the detached first (a and b) and third (c and d) leaves of hexaploid wheat on the 3<sup>rd</sup> day after infection. A and c, are representative images of infected leaves; b and d – size of the lesion zone. Stars indicate a statistically significant difference from the non-treated with MeJA control at  $p \leq 0.05$  assessed by the Student's t test.

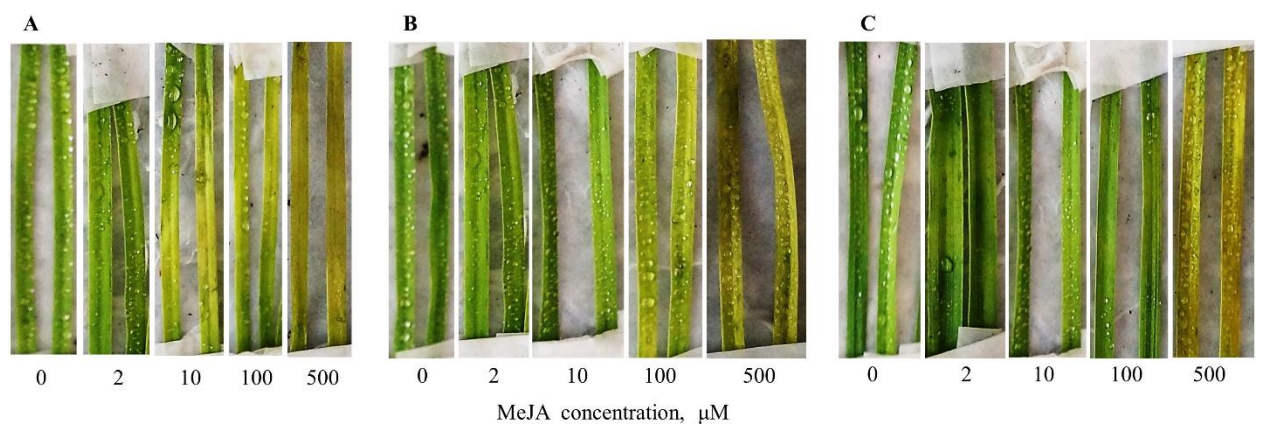

Figure S4. Effect of MeJA on the Sar-60 leaf yellowing, 1<sup>st</sup> (a), 2<sup>nd</sup> (b), and 3<sup>rd</sup> (c) leaves.
